# Supplementary material for: Ionic liquid-hydroxide-mediated low-temperature synthesis of high-entropy perovskite oxide nanoparticles
Source: Royal Society of Chemistry journal article supplement (doi:10.1039/d1nr08316c), 2022-01-01
Supplement: d1nr08316c1.pdf [file d1nr08316c1.pdf]

## Supporting Information

### Ionic liquid-hydroxide-mediated Low-temperature Synthesis of High-entropy Perovskite Oxides Nanoparticles

Yingying Shi<sup>a</sup>, Qiuchen Xu<sup>a</sup>, Zhangmin Tian<sup>a</sup>, Guiying Liu<sup>a</sup>, Chenxu Ma<sup>a</sup>  
and Wenjun Zheng<sup>\*,a,b</sup>

*a. Department of Chemistry, Key Laboratory of Advanced Energy Materials Chemistry (MOE), TKL of Metal and Molecule-based Material Chemistry, College of Chemistry, Nankai University, Tianjin, 300071, P. R. China.*

*b. Collaborative Innovation Center of Chemical Science and Engineering, Nankai University, Tianjin, 300071, P. R. China.*

*\*Corresponding author. Tel.: +86 22 23507951. Fax: +86 22 23502458. E-mail: zhwj@nankai.edu.cn.*

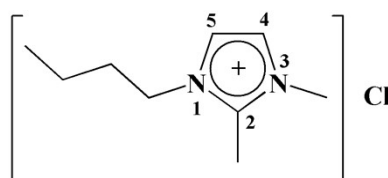

**Fig. S1.** Structure of [BMMIm]Cl (1-butyl-2,3-dimethylimidazolium chloride).

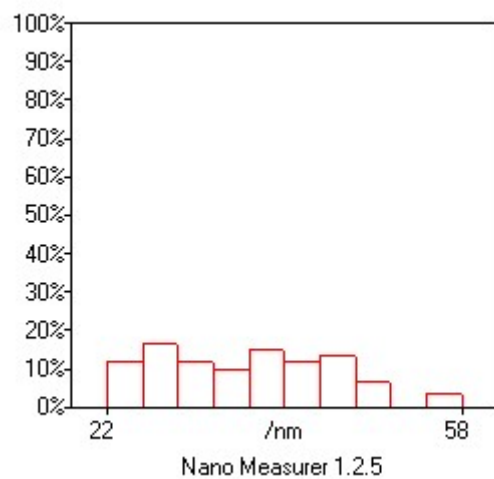

**Fig. S2.** The size distribution counting of Ba(FeNbTiZrTa)O<sub>3</sub> in Fig. 3a.

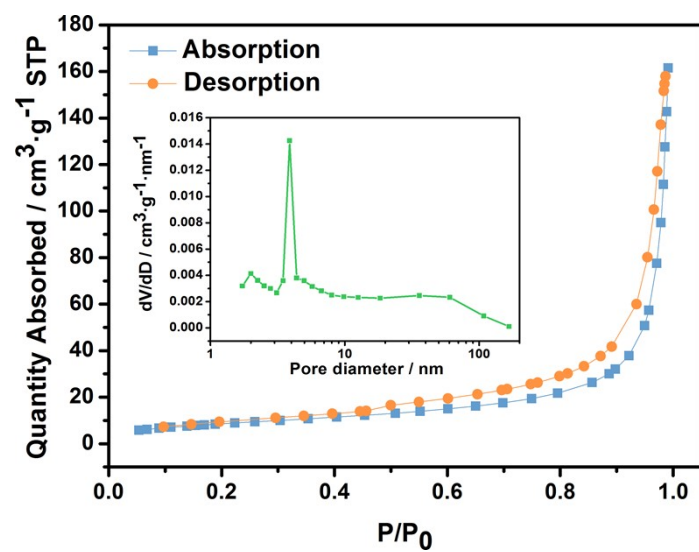

**Fig. S3.** N<sub>2</sub> adsorption-desorption isotherm and pore size distribution of Ba(FeNbTiZrTa)O<sub>3</sub>.

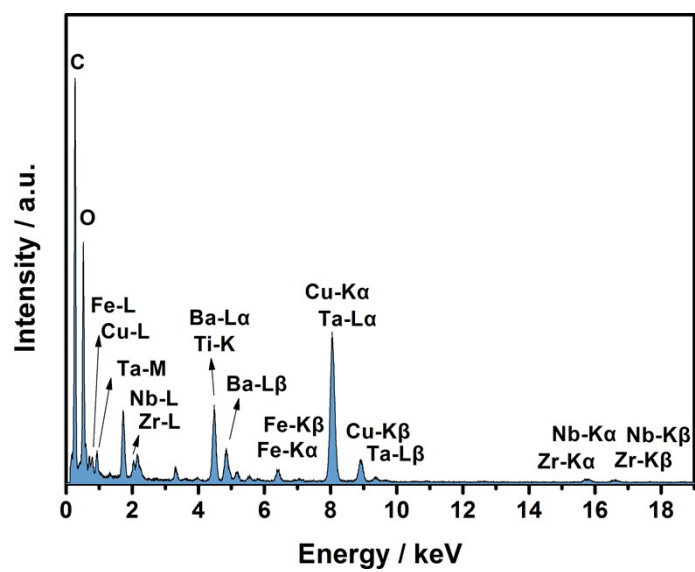

**Fig. S4.** EDX spectrum of Ba(FeNbTiZrTa)O<sub>3</sub>.

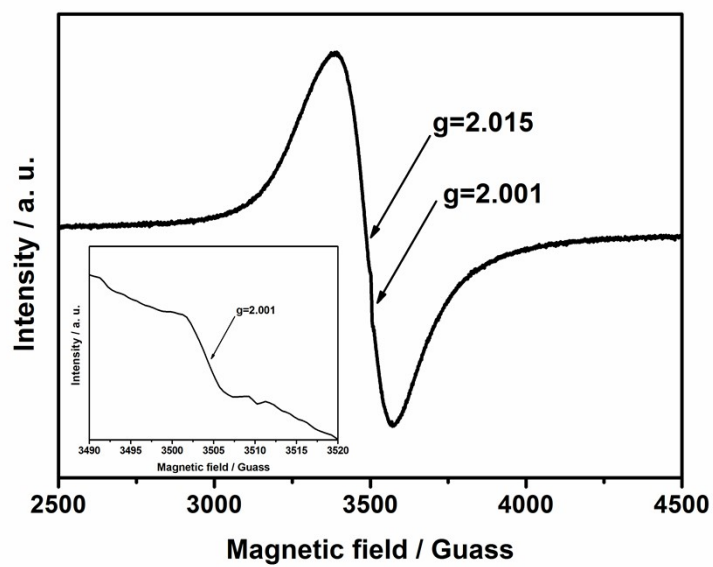

**Fig. S5.** Room temperature EPR spectrum of Ba(FeNbTiZrTa)O<sub>3</sub>.

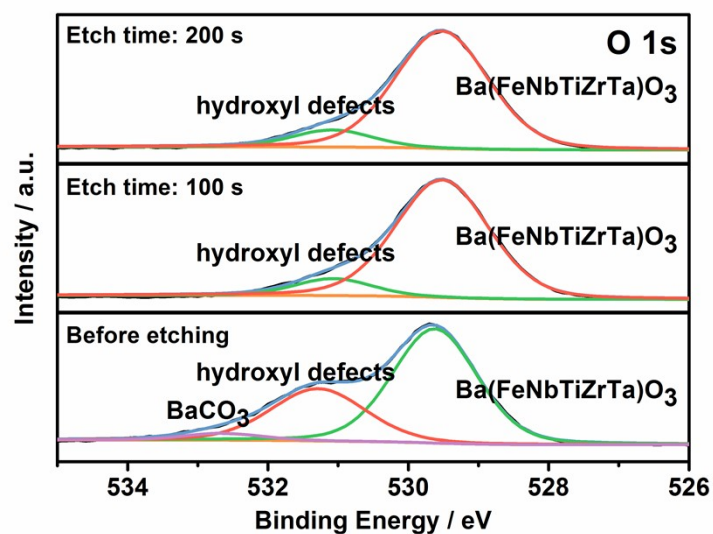

**Fig. S6.** The depth profiled XPS spectra of O 1s in  $\text{Ba}(\text{FeNbTiZrTa})\text{O}_3$ .

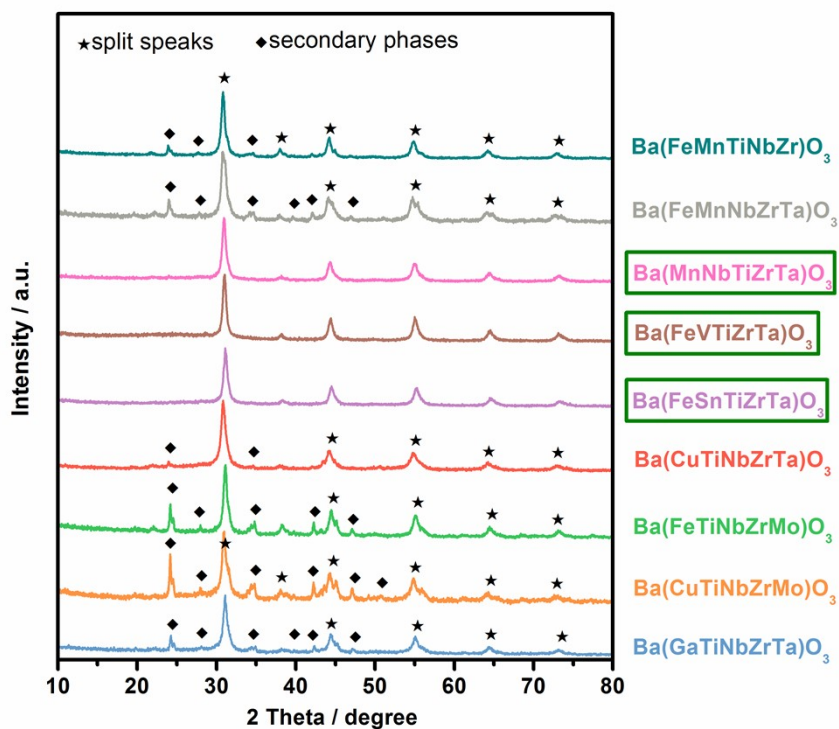

**Fig. S7.** XRD patterns for  $\text{ABO}_3$  with five metals at B site, in which single-phase HEPOs are marked with green frames. The raw cation-supplying materials of Cu, Mo and Ga sources are  $\text{Cu}(\text{NO}_3)_2 \cdot 3\text{H}_2\text{O}$ ,  $\text{MoO}_3$  and  $\text{Ga}(\text{NO}_3)_3 \cdot \text{H}_2\text{O}$ , respectively.

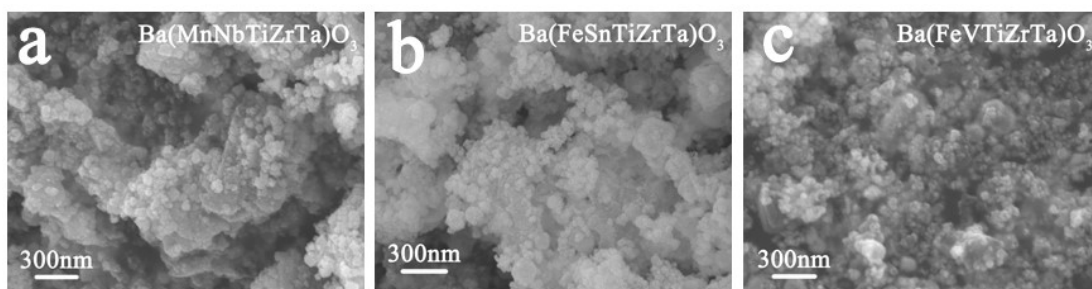

**Fig. S8.** SEM images of (a) Ba(MnNbTiZrTa)O<sub>3</sub>, (b) Ba(FeSnTiZrTa)O<sub>3</sub> and (c) Ba(FeVTiZrTa)O<sub>3</sub>.

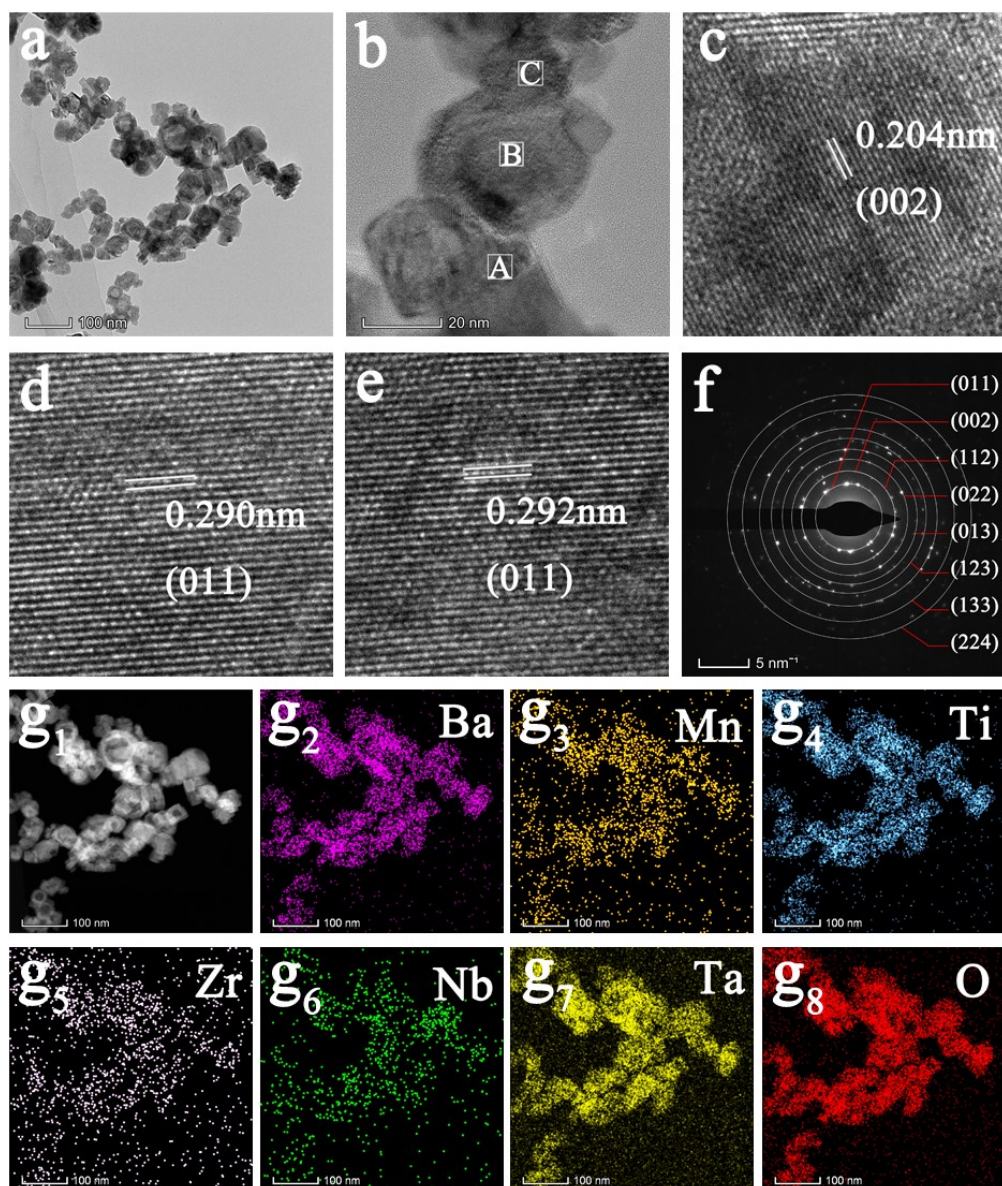

**Fig. S9.** (a) TEM image, (b-e) HRTEM images (Fig. S9c, Fig. S9d and Fig. S9e are the micrographs of region A, B and C in Fig. S9b, respectively), (f) corresponding SAED pattern and (g) EDX elemental mappings of  $\text{Ba}(\text{MnNbTiZrTa})\text{O}_3$ .

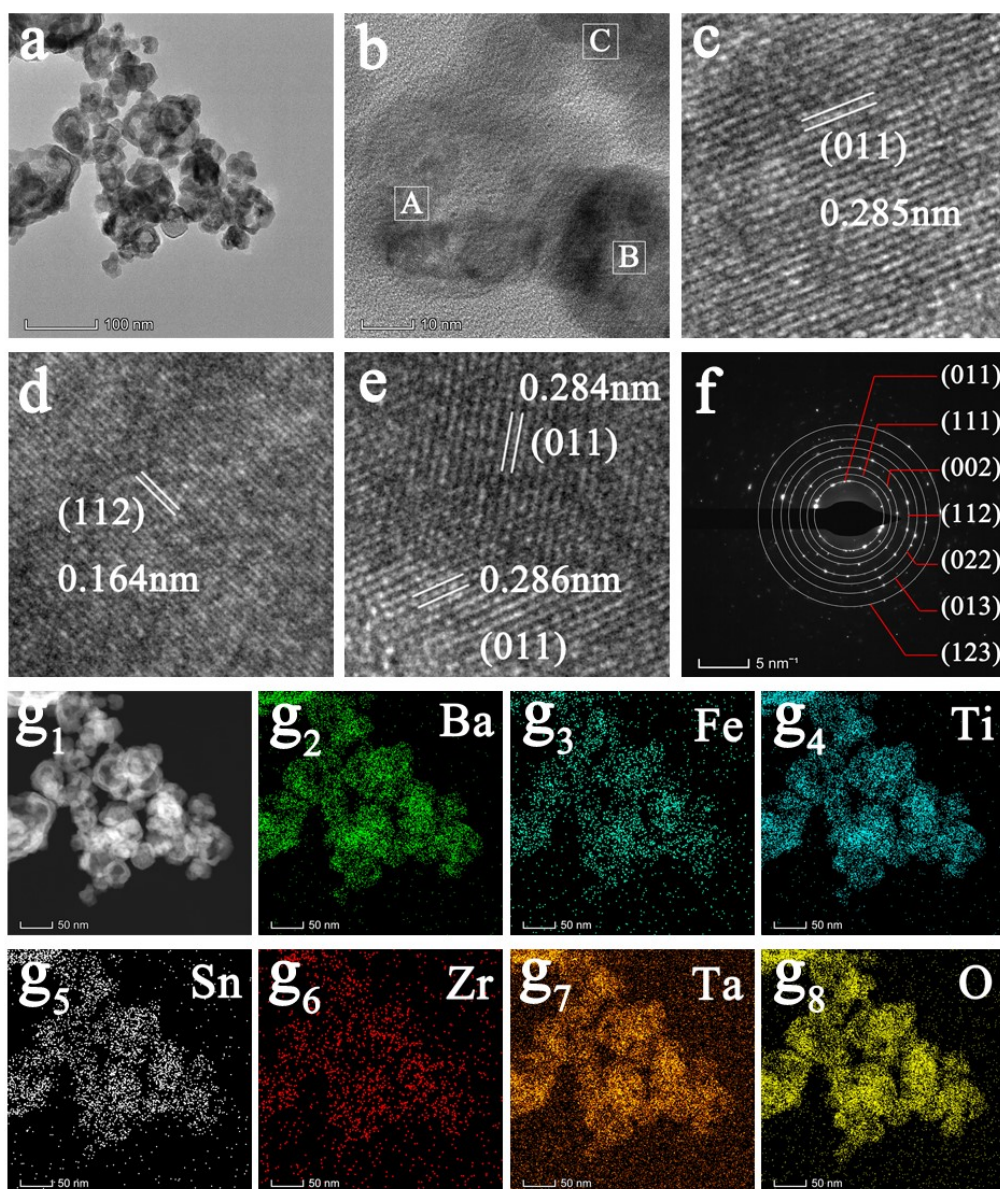

**Fig. S10.** (a) TEM image, (b-e) HRTEM images (Fig. S10c, Fig. S10d and Fig. S10e are the micrographs of region A, B and C in Fig. S10b, respectively), (f) corresponding SAED pattern and (g) EDX elemental mappings of  $\text{Ba}(\text{FeSnTiZrTa})\text{O}_3$ .

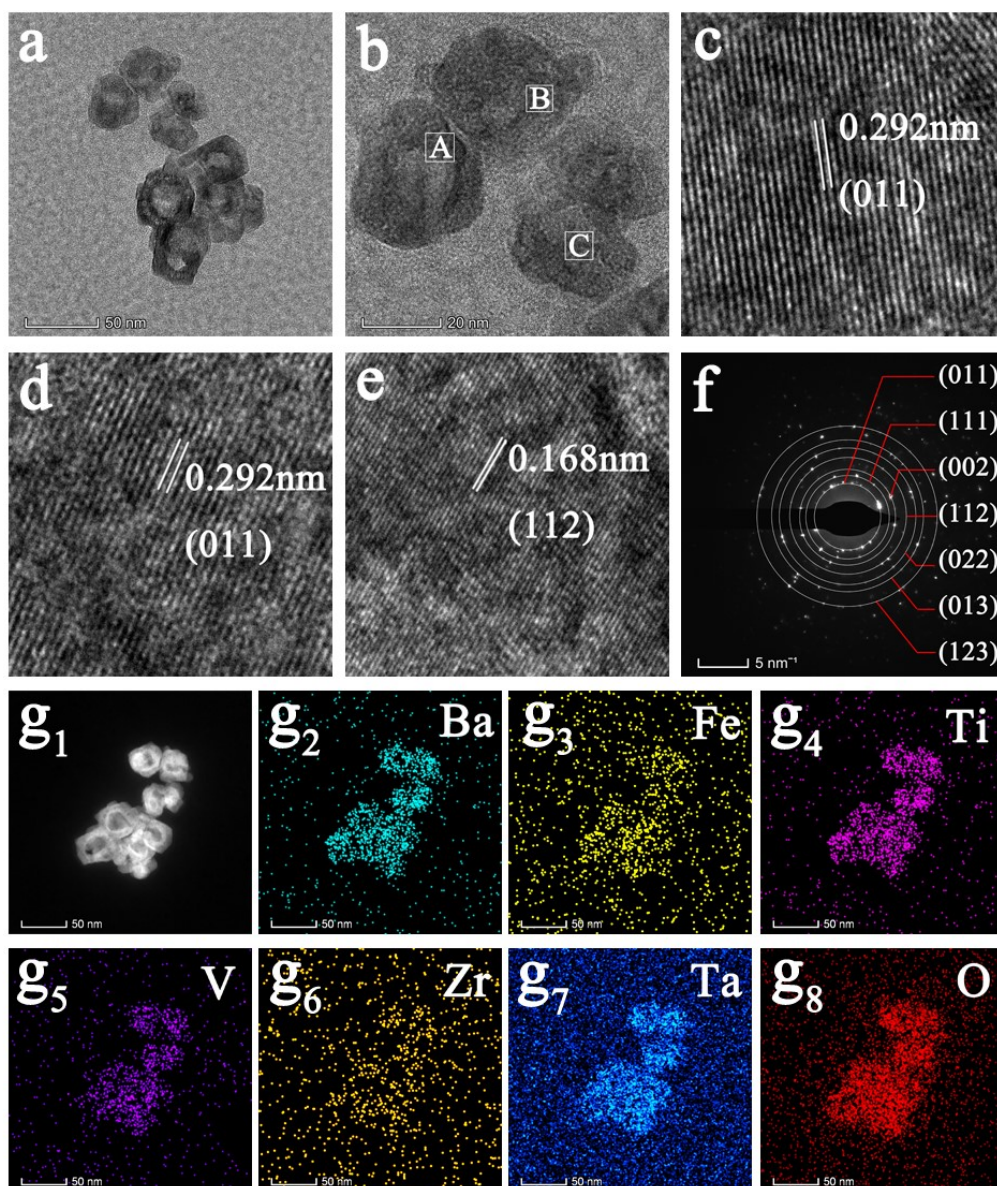

**Fig. S11.** (a) TEM image, (b-e) HRTEM images (Fig. S11c, Fig. S11d and Fig. S11e are the micrographs of region A, B and C in Fig. S11b, respectively), (f) corresponding SAED pattern and (g) EDX elemental mappings of  $\text{Ba}(\text{FeVTiZrTa})\text{O}_3$ .

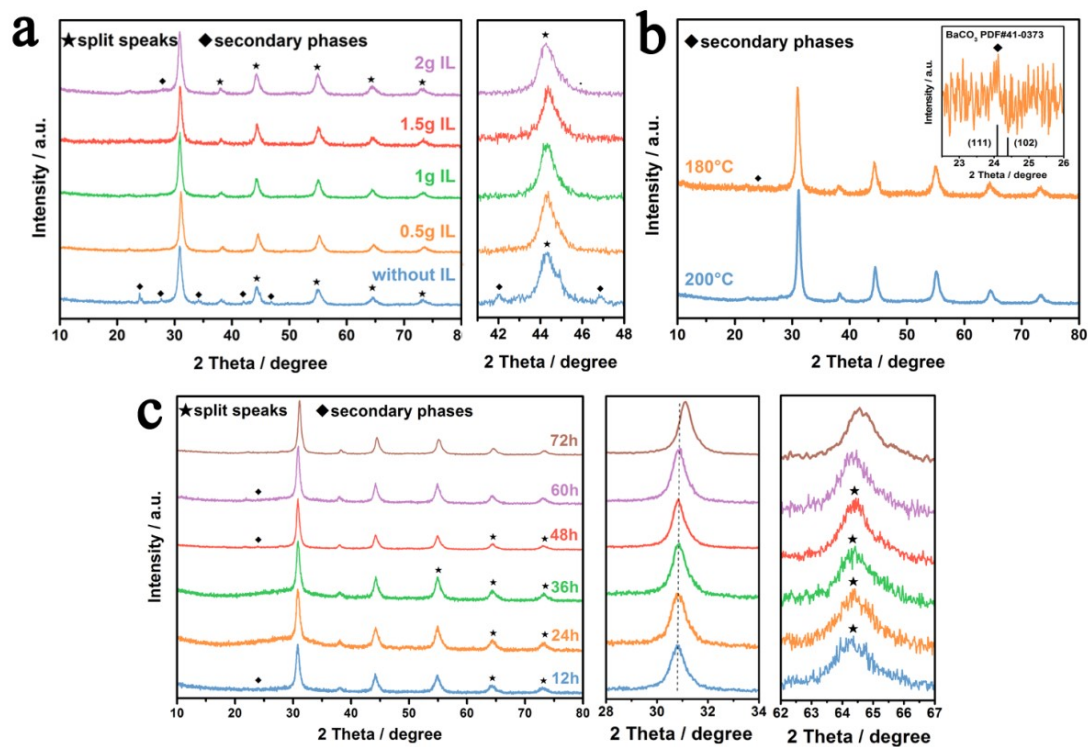

**Fig. S12.** (a) XRD patterns of  $\text{Ba}(\text{FeTiNbZrTa})\text{O}_3$  with different amount of  $[\text{BMMIm}]\text{Cl}$ , (b) XRD patterns of  $\text{Ba}(\text{FeNbTiZrTa})\text{O}_3$  with different reaction temperature, (c) XRD patterns of  $\text{Ba}(\text{FeTiNbZrTa})\text{O}_3$  with different reaction time.

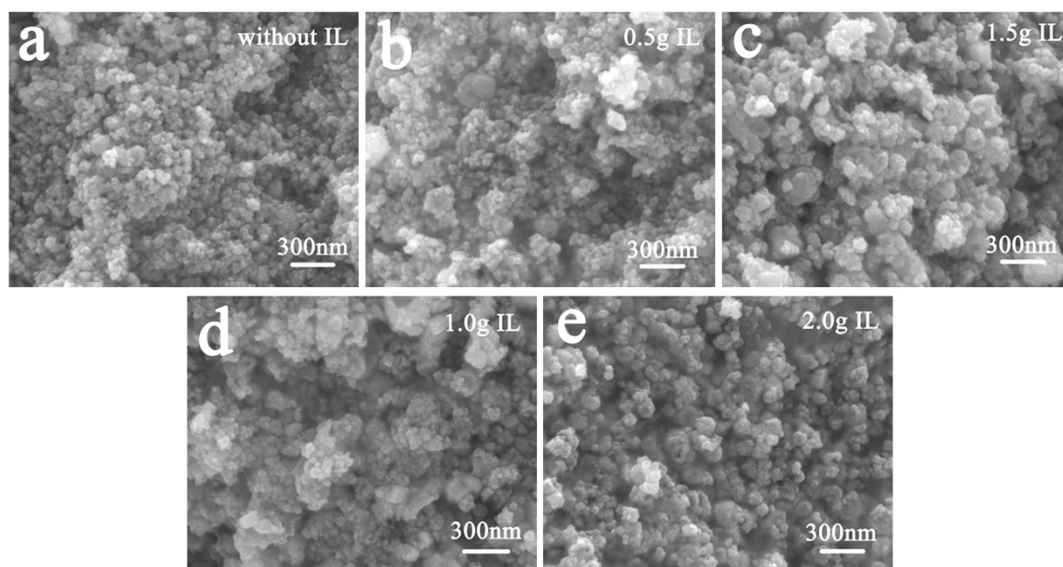

**Fig. S13.** SEM images of  $\text{Ba}(\text{FeNbTiZrTa})\text{O}_3$  with different amount of  $[\text{BMMIm}]\text{Cl}$  in the synthesis process.

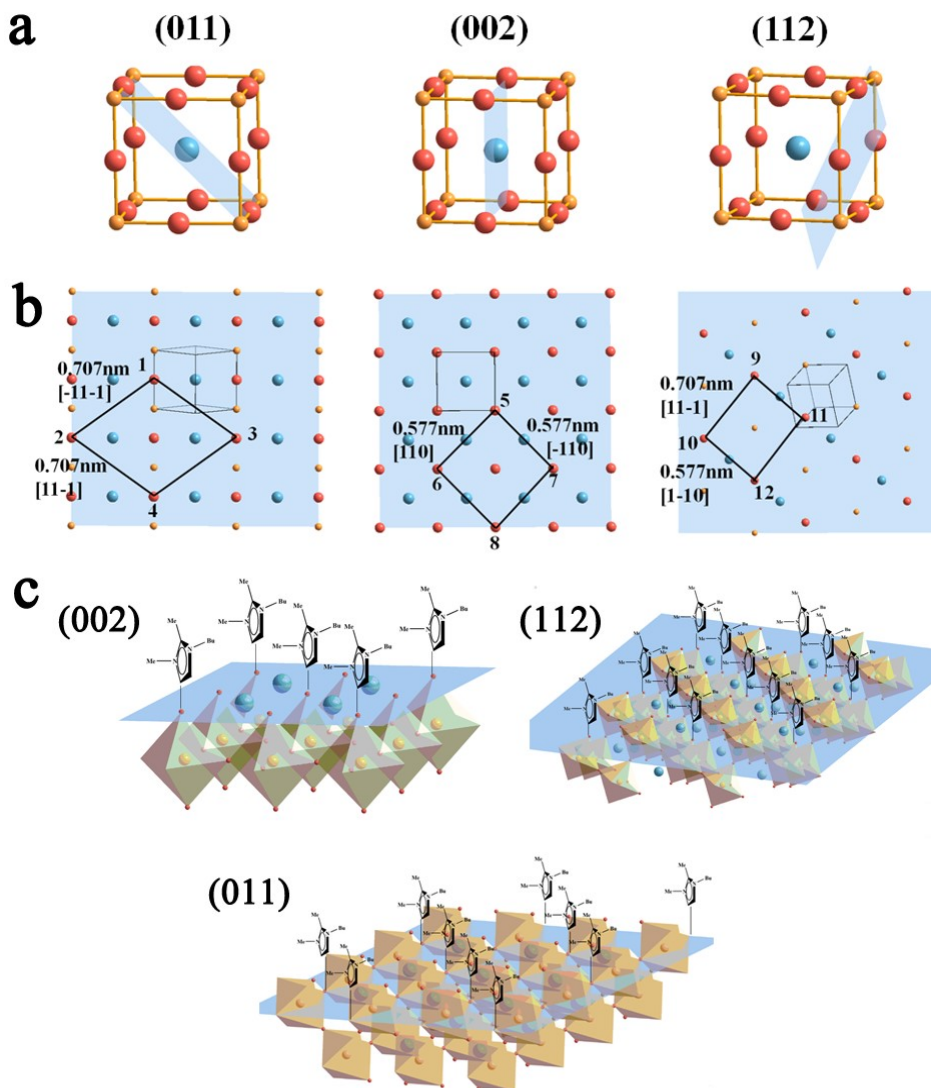

**Fig. S14.** Schematic illustrations of (a) the (011), (002) and (112) planes of  $\text{Ba}(\text{FeNbTiZrTa})\text{O}_3$ , (b) surface structures of the primary stable crystal planes, (c) a projected view of  $[\text{BMMIm}]^+$  ions anchored onto (011), (002) and (112) planes to form tight coverage layers. Blue atoms: Ba, yellow atoms: B site metals and red atoms: O.

The large viscosity of  $[\text{BMMIm}]\text{Cl-KOH}$  system and the low reaction temperature results in a relatively slow growth of perovskite,<sup>1</sup> which is important for the formation of dispersive and small-sized nanoparticles of  $\text{Ba}(\text{FeNbTiZrTa})\text{O}_3$ ; meanwhile,  $[\text{BMMIm}]\text{Cl}$  plays another major

role. As the supramolecular fluid, ILs feature multiple coexisting interactions, such as hydrogen bonds, electrostatic interactions and  $\pi$ - $\pi$  stacking.<sup>2, 3</sup> Because of surface basic properties, positive charged [BMMIm]<sup>+</sup> ions can adsorb on the surface of Ba(FeNbTiZrTa)O<sub>3</sub>, so adsorbing competition between K<sup>+</sup>, Ba<sup>2+</sup> and [BMMIm]<sup>+</sup> is then considered. Although K<sup>+</sup> or Ba<sup>2+</sup> ions present higher electrostatic effect, [BMMIm]<sup>+</sup> ions have more preference for adsorbing on the surface of Ba(FeNbTiZrTa)O<sub>3</sub>. Besides electrostatic interactions, three other factors can be identified for the adsorption of [BMMIm]<sup>+</sup> ions: the first factor is the large steric hindrance of [BMMIm]<sup>+</sup> ions, which will hinder the diffusion of K<sup>+</sup> and Ba<sup>2+</sup> ions toward the surface of Ba(FeNbTiZrTa)O<sub>3</sub>; the second one is based on the mutual  $\pi$ -stacking interaction between imidazole rings; and the third influencing factor is the hydrogen-bonding interaction between [BMMIm]<sup>+</sup> ions and O atoms. The H-bond donor is the C-H unit within an imidazole cation, which can be a C-H on the aromatic ring, or a C-H from the methylene or methyl groups of the alkyl chains.<sup>3, 4</sup> However, stronger hydrogen-bonding interactions are found with the ring C<sup>4</sup>-H and C<sup>5</sup>-H ( $\approx 2.2$  Å) in imidazole rings, while alkyl H-bonds are of medium strength, and bond distances are longer and more variable ( $\approx 2.3$ -2.7 Å) depending on the local conformation of the alkyl chain;<sup>4, 5</sup> further considering the steric effect, hydrogen-bonds exist in the formation of O (Ba(FeNbTiZrTa)O<sub>3</sub> surface)-H-C<sup>4</sup> ([BMMIm]<sup>+</sup> rings).<sup>6, 7</sup>

On the other hand, the adsorption selectivity of [BMMIm]<sup>+</sup> ions on the crystal facets of a substrate should be restricted by the geometric matching principle, which means that the adsorption sites of the substrate should meet the space requirement for interionic stacking of imidazole cations.<sup>8</sup> According to previous reports, mutual  $\pi$ -stacking distance between imidazole rings is about 0.6-0.7 nm. The atomic arrangements of the primary stable crystal planes of (011),

(002) and (112) planes for simulated Ba(FeNbTiZrTa)O<sub>3</sub> structure are presented in Fig. S14a-S14b, in which the distances between O atoms on the (011) plane along [11-1] and [-11-1] directions are both 0.707 nm, so that [BMMIm]<sup>+</sup> can adsorb on (011) plane along [11-1] and [-11-1] directions. In addition, the atom arrangement of the (002) facet indicates that the distances between O atoms are both 0.577 nm along [110] and [-110] directions, while the distances between O atoms are 0.577 nm and 0.707 nm in the directions of [1-10] and [11-1] for the (112) plane of Ba(FeNbTiZrTa)O<sub>3</sub>, respectively. Accordingly, (011), (002) and (112) planes are appropriate for the mutual  $\pi$ -stacking distance of imidazole rings, and as such, [BMMIm]<sup>+</sup> ions can vertically adsorb on these facets to generate compact adsorption layers. As shown in Fig. S14b, [BMMIm]<sup>+</sup> ions are located in the 1, 2, 3, 4 sites in (011) plane, 5, 6, 7, 8 sites in (002) plane and 9, 10, 11, 12 sites in (112) plane, respectively. However, the distances between O atoms of 1-4 sites and 2-3 sites are 0.816 nm and 1.154 nm in (011) plane, respectively, which do not meet the space requirement for interionic stacking of imidazole cations. Similarly, the distances between O atoms of 5-8 sites and 6-7 sites are both 0.816 nm in (002) plane, while the distances between O atoms of 9-12 sites and 10-11 sites are both 0.913 nm in (112) plane. Thus, the adsorption layers of [BMMIm]<sup>+</sup> ions is most stable in (002) planes due to the minimum deviation from the mutual  $\pi$ -stacking distance of imidazole rings in different directions; on the contrary, the adsorption layers of [BMMIm]<sup>+</sup> ions is most unstable in (011) planes, so [BMMIm]Cl has a greater impact on (002) and (112) planes than (011) plane, which accords with XRD results. The projected views of [BMMIm]<sup>+</sup> ions adsorbed onto (011), (002) and (112) facets of Ba(FeNbTiZrTa)O<sub>3</sub> to form tight coverage layers are presented in Fig. S14c, thus the growth of Ba(FeNbTiZrTa)O<sub>3</sub> are inhibited, resulting in the formation of dispersive, small-sized nanoparticles.

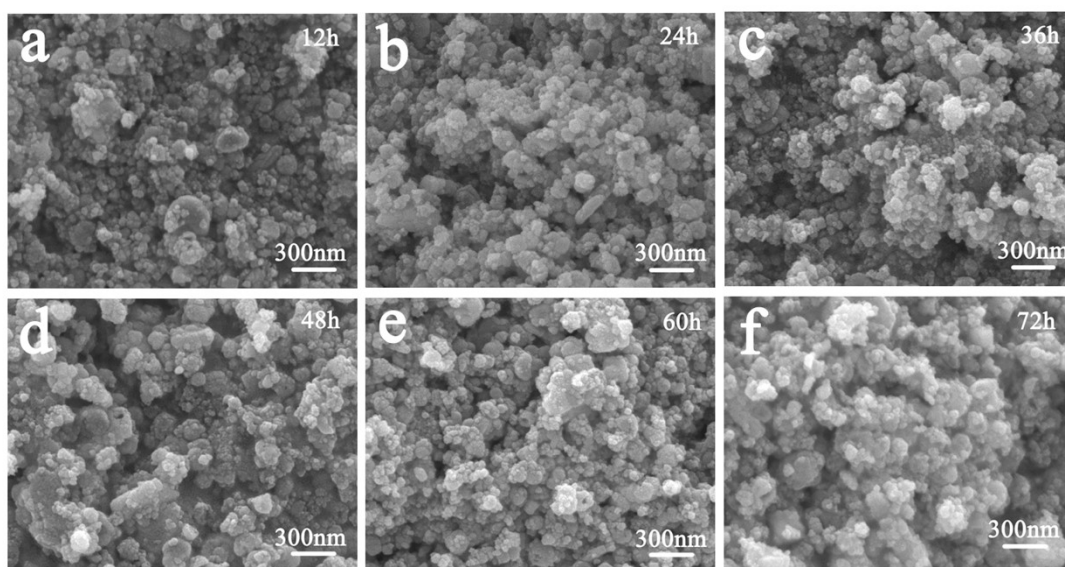

**Fig. S15.** SEM images of  $\text{Ba}(\text{FeNbTiZrTa})\text{O}_3$  with different reaction time.

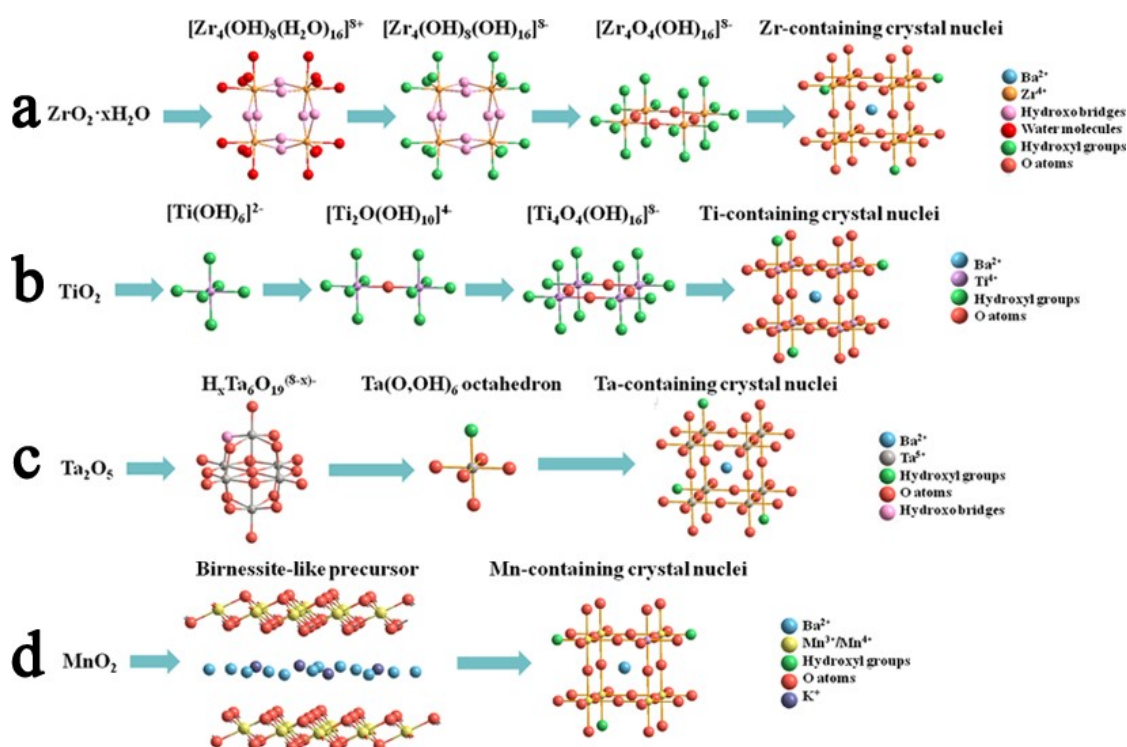

**Fig. S16.** Schematic representation of the hydrolysis and condensation processes for (a) Zr species, (b) Ti species (Similar process happens to Sn, Fe and V species), (c) Ta species (Similar process happens to Nb species), and (d) Mn species.

At the beginning,  $\text{ZrOCl}_2 \cdot 8\text{H}_2\text{O}$  is mixed with  $\text{KOH}$ , resulting in the formation of amorphous  $\text{ZrO}_2 \cdot x\text{H}_2\text{O}$ , in which the tetramer complexes with 8 hydroxo bridges and 16 coordinate water molecules,  $[\text{Zr}_4(\text{OH})_8(\text{H}_2\text{O})_{16}]^{8+}$ , are the major species. Water ligands of tetramer ionize to give the hydroxide complex under basic condition,<sup>9, 10</sup> thus the negative charged tetramer complexes  $[\text{Zr}_4(\text{OH})_8(\text{OH})_{16}]^{8-}$  are generated. Under proper reaction temperature and basicity, 6-fold Zr species  $[\text{Zr}_4\text{O}_4(\text{OH})_{16}]^{8-}$  linked by bridging O atoms are formed *via* hydrolysis and condensation reactions, which have strong interactions with positive charged barium ions, thus crystal nuclei of perovskite with Zr in B site are formed.

A dissolution-precipitation mechanism is taking place when  $\text{TiO}_2$  is used as metal source.<sup>11, 12</sup> Ti-O bonds are broken via hydrolytic attack to form hydroxytitanium complexes  $[\text{Ti}(\text{OH})_x]^{4-x}$  capable of dissolution, and the 6-fold Ti coordinated species  $[\text{Ti}(\text{OH})_6]^{2-}$  are the main species at highly basic condition.<sup>13</sup> The subsequent condensation reactions lead to the formation of polymeric chains composed of thermodynamically stable corner-shared  $\text{Ti}(\text{O},\text{OH})_6$  octahedrons, such as  $[\text{Ti}_2\text{O}(\text{OH})_{10}]^{4-}$ ,  $[\text{Ti}_3\text{O}_2(\text{OH})_{14}]^{10-}$ ,  $[\text{Ti}_4\text{O}_4(\text{OH})_{16}]^{8-}$ , in which the skeleton of the polymer corresponds to Ti atoms linked by bridging O atoms.<sup>14</sup> Negative charged polymeric chains of Ti hydroxides react with  $\text{Ba}^{2+}$  ions, resulting in the formation of crystal nuclei for perovskite with Ti in B site. Similarly, the Sn/Fe-containing crystal nuclei of perovskite are formed from  $[\text{Sn}(\text{OH})_6]^{2-}$ <sup>15, 16</sup> and  $[\text{Fe}(\text{OH})_6]^{3-}$ <sup>17, 18</sup> species, while V-containing crystal nuclei of perovskite are possibly formed from  $\text{V}(\text{OH})_6^{2-}$  species after V(V) is reduced to V(IV).

When  $\text{MnO}_2$  is used as metal source, a part of Mn(IV) is likely to be reduced to Mn(III) in  $[\text{BMMIm}]\text{Cl-KOH}$  system. The amorphous birnessite-like precursor is formed after

MnO<sub>2</sub> is dissolved and partly reduced,<sup>19</sup> which has an octahedral layer structure composed of edge-shared MnO<sub>6</sub> octahedron and metal ions located in the interlayer space of the mixed-valent MnO<sub>6</sub> octahedron.<sup>20</sup> The birnessite-like precursor is an intermediate phase to crystalline perovskite phase because of the similarity of the Mn-O framework of birnessite and perovskite structures. Subsequently, a dissolution and crystallization process happens to the birnessite-like precursor, and the rearrangement of MnO<sub>6</sub> octahedrons occurs, forming thermodynamically stable corner-shared MnO<sub>6</sub> structures with Ba<sup>2+</sup> ions located in the interstitial void of neighboring octahedron, thus Mn-containing crystal nuclei of perovskite are formed.

When Nb<sub>2</sub>O<sub>5</sub> or Ta<sub>2</sub>O<sub>5</sub> is used in the synthesis process, Nb(V) is reduced to Nb(IV), while Ta(V) remains unchanged. Ta<sub>2</sub>O<sub>5</sub> is dissolved into H<sub>x</sub>Ta<sub>6</sub>O<sub>19</sub><sup>(8-x)-</sup> clusters in [BMMIm]Cl-KOH system, which are composed of six edge-shared Ta(O,OH)<sub>6</sub> octahedrons;<sup>21</sup> H<sub>x</sub>Ta<sub>6</sub>O<sub>19</sub><sup>(8-x)-</sup> clusters will transform to octahedron H<sub>x</sub>TaO<sub>6</sub><sup>(7-x)-</sup> anions, which act as elementary species for perovskite structures.<sup>22</sup> H<sub>x</sub>Nb<sub>6</sub>O<sub>19</sub><sup>(14-x)-</sup> is produced and transformed to H<sub>x</sub>NbO<sub>6</sub><sup>(8-x)-</sup> through similar processes. H<sub>x</sub>TaO<sub>6</sub><sup>(7-x)-</sup>/H<sub>x</sub>NbO<sub>6</sub><sup>(8-x)-</sup> anions are linked by bridging O atoms, finally forming thermodynamically stable corner-shared TaO<sub>6</sub>/NbO<sub>6</sub> structures with Ba<sup>2+</sup> in the interstitial void of neighboring octahedron, thus crystal nuclei of perovskite with Ta/Nb in B site are formed.

**Table S1.** The element composition of Ba(FeNbTiZrTa)O<sub>3</sub> determined by ICP-OES.

| Element       | Ba                                                                                                        | Fe   | Nb   | Ti   | Zr   | Ta   |
|---------------|-----------------------------------------------------------------------------------------------------------|------|------|------|------|------|
| Content (wt%) | 63.5                                                                                                      | 6.37 | 13.7 | 5.75 | 10.9 | 24.4 |
| Atomic ratio  | $\text{Fe/Nb/Ti/Zr/Ta} = 0.179:0.232:0.189:0.188:0.212$ $\text{A/B (A=Ba, B=Fe, Ti, Nb, Zr, Ta)} = 0.727$ |      |      |      |      |      |

**Table S2.** Content of hydroxyl defects in Ba(FeNbTiZrTa)O<sub>3</sub>.

| Material        | Content of hydroxyl defects |
|-----------------|-----------------------------|
| Before etching  | 33.7%                       |
| Etch time: 100s | 10.6%                       |
| Etch time: 200s | 11.1%                       |

**Table S3.** The ratio of diffraction peak intensity between (011), (002) and (112) planes in Ba(FeNbTiZrTa)O<sub>3</sub> structure.

| IL dosage / g           | 0     | 0.5   | 1     | 1.5   | 2     |
|-------------------------|-------|-------|-------|-------|-------|
| $I_{(002)} / I_{(011)}$ | 25.7% | 27.8% | 30.8% | 32.7% | 34.4% |
| $I_{(112)} / I_{(011)}$ | 23.2% | 26.1% | 28.0% | 29.6% | 32.1% |

**Table S4.** Stability constants of metal ion-hydroxyl coordination compounds.<sup>23-25</sup>

| Metal ion | logK <sub>1</sub> | logK <sub>2</sub> | logK <sub>3</sub> | logK <sub>4</sub> |
|-----------|-------------------|-------------------|-------------------|-------------------|
| Fe (III)  | 11.87             | 21.17             | 29.67             | -                 |
| Ti (IV)   | -                 | -                 | 11.9              | 10.3              |
| Zr (IV)   | 14.3              | 28.3              | 41.9              | 55.3              |
| V (IV)    | 8.6               | -                 | -                 | -                 |
| V (V)     | -                 | 25.2              | -                 | 46.2              |
| Sn (IV)   | -                 | -                 | -                 | 57.3              |

**Table S5.** Comparison of different synthesis methods for HEPOs.

| Materials                                                                                                                                                                                                                                                                                                                                                                                                                                                                                                                                                                                                                                                                                                                                   | Method                                 | Mental sources                              | Reaction conditions                                                                             | Particle size                                    | References    |
|---------------------------------------------------------------------------------------------------------------------------------------------------------------------------------------------------------------------------------------------------------------------------------------------------------------------------------------------------------------------------------------------------------------------------------------------------------------------------------------------------------------------------------------------------------------------------------------------------------------------------------------------------------------------------------------------------------------------------------------------|----------------------------------------|---------------------------------------------|-------------------------------------------------------------------------------------------------|--------------------------------------------------|---------------|
| Ba(FeNbTiZrTa)O <sub>3</sub> , Ba(MnNbTiZrTa)O <sub>3</sub> ,<br>Ba(FeSnTiZrTa)O <sub>3</sub> , Ba(FeVTiZrTa)O <sub>3</sub>                                                                                                                                                                                                                                                                                                                                                                                                                                                                                                                                                                                                                 | Ionic liquid-hydroxide-mediated method | Mental oxides, mental nitrate salts, et al. | Synthesized at 200°C or lower for 72h                                                           | 20-60nm, mean particle size of 36nm              | This paper    |
| Sr(Zr <sub>0.2</sub> Sn <sub>0.2</sub> Ti <sub>0.2</sub> Hf <sub>0.2</sub> Mn <sub>0.2</sub> )O <sub>3</sub> ,<br>Sr(Zr <sub>0.2</sub> Sn <sub>0.2</sub> Ti <sub>0.2</sub> Hf <sub>0.2</sub> Nb <sub>0.2</sub> )O <sub>3</sub> ,<br>Ba(Zr <sub>0.2</sub> Sn <sub>0.2</sub> Ti <sub>0.2</sub> Hf <sub>0.2</sub> Ce <sub>0.2</sub> )O <sub>3</sub> ,<br>Ba(Zr <sub>0.2</sub> Sn <sub>0.2</sub> Ti <sub>0.2</sub> Hf <sub>0.2</sub> Y <sub>0.2</sub> )O <sub>3-x</sub> ,<br>Ba(Zr <sub>0.2</sub> Sn <sub>0.2</sub> Ti <sub>0.2</sub> Hf <sub>0.2</sub> Nb <sub>0.2</sub> )O <sub>3</sub> ,<br>(Sr <sub>0.5</sub> Ba <sub>0.5</sub> )(Zr <sub>0.2</sub> Sn <sub>0.2</sub> Ti <sub>0.2</sub> Hf <sub>0.2</sub> Nb <sub>0.2</sub> )O <sub>3</sub> | Solid phase sintering method           | Mental oxides                               | High energy ball milled, calcined at 1300-1500°C for 10h.                                       | Not reported                                     | <sup>26</sup> |
| (Gd <sub>0.2</sub> La <sub>0.2</sub> Nd <sub>0.2</sub> Sm <sub>0.2</sub> Y <sub>0.2</sub> )CoO <sub>3</sub> ,<br>La(Co <sub>0.2</sub> Cr <sub>0.2</sub> Fe <sub>0.2</sub> Mn <sub>0.2</sub> Ni <sub>0.2</sub> )O <sub>3</sub> ,<br>(Gd <sub>0.2</sub> La <sub>0.2</sub> Nd <sub>0.2</sub> Sm <sub>0.2</sub> Y <sub>0.2</sub> )(Co <sub>0.2</sub> Cr <sub>0.2</sub> Fe <sub>0.2</sub> Mn <sub>0.2</sub> Ni <sub>0.2</sub> )O <sub>3</sub> , et al.                                                                                                                                                                                                                                                                                           | Nebulised spray pyrolysis method       | Mental nitrate salts                        | Formed at a temperature of 1050°C and a pressure of 900mbar, further calcined at 1200°C for 2h. | 50-450nm, mean particle size of 180nm            | <sup>27</sup> |
| Sr((Zr <sub>0.94</sub> Y <sub>0.06</sub> ) <sub>0.2</sub> Sn <sub>0.2</sub> Ti <sub>0.2</sub> Hf <sub>0.2</sub> Mn <sub>0.2</sub> )O <sub>3-x</sub>                                                                                                                                                                                                                                                                                                                                                                                                                                                                                                                                                                                         | Reactive spark plasma sintering        | Mental oxides                               | Sintered at 1450°C and 1375°C for 9min                                                          | Long-range homogeneous microstructure with a few | <sup>28</sup> |

|                                                                                                                  |                                        |                                                                                                                                                                                          |                                                                                |                                                                       |    |
|------------------------------------------------------------------------------------------------------------------|----------------------------------------|------------------------------------------------------------------------------------------------------------------------------------------------------------------------------------------|--------------------------------------------------------------------------------|-----------------------------------------------------------------------|----|
|                                                                                                                  |                                        |                                                                                                                                                                                          |                                                                                | residual pores                                                        |    |
| $\text{La}_{1-x}\text{Sr}_x(\text{CoCrFeMnNi})\text{O}_{3-\delta}$                                               | sol-gel method                         | Mental nitrate salts                                                                                                                                                                     | Calcined at 700°C for 6h, further<br>calcined at 1000°C for 20h                | Not reported                                                          | 29 |
| $(\text{Gd}_{0.2}\text{Nd}_{0.2}\text{La}_{0.2}\text{Sm}_{0.2}\text{Y}_{0.2})\text{CoO}_3$                       | Coprecipitation hydrothermal<br>method | Mental nitrate salts                                                                                                                                                                     | Hydrothermal synthesized at<br>150°C for 72h and calcined at<br>1200°C for 2h. | A homogenous<br>distribution of few-<br>micrometer-diameter<br>grains | 30 |
| $\text{Ba}(\text{Zr}_{0.2}\text{Sn}_{0.2}\text{Ti}_{0.2}\text{Hf}_{0.2}\text{Nb}_{0.2})\text{O}_3$ thin<br>films | Pulsed laser deposition method         | Ceramic target<br>substrate of<br>$\text{Ba}(\text{Zr}_{0.2}\text{Sn}_{0.2}\text{Ti}_{0.2}\text{Hf}_{0.2}\text{Nb}_{0.2})\text{O}_3$ synthesized<br>by<br>solid-state reaction<br>method | Oxygen partial pressure of<br>150mTorr at a substrate<br>temperature of 750°C  | Thicknesses of 7,<br>26 and 72 nm.                                    | 31 |
| $\text{BaSr}(\text{ZrHfTi})\text{O}_3$ ,<br>$\text{BaSrBi}(\text{ZrHfTiFe})\text{O}_3$                           | Ultrasonication-based method           | Mental chlorides                                                                                                                                                                         | Room-temperature                                                               | Average diameter of<br>(76±1.7)nm                                     | 32 |

## References

1. H. Liu, C. Hu and Z. L. Wang, *Nano Lett.*, 2006, 6, 1535-1540.
2. Z. Ma, J. Yu and S. Dai, *Adv. Mater.*, 2010, 22, 261-285.
3. Y.-L. Wang, B. Li, S. Sarman, F. Mocci, Z.-Y. Lu, J. Yuan, A. Laaksonen and M. D. Fayer, *Chem. Rev.*, 2020, 120, 5798-5877.
4. P. A. Hunt, C. R. Ashworth and R. P. Matthews, *Chem. Soc. Rev.*, 2015, 44, 1257-1288.
5. P. A. Hunt and I. R. Gould, *J. Phys. Chem. A*, 2006, 110, 2269-2282.
6. W. Zheng, X. Liu, Z. Yan and L. Zhu, *ACS Nano*, 2009, 3, 115-122.
7. Y. Liu, Q. Xu, R. Wang, Y. Zheng, Z. Wang and W. Zheng, *ACS Appl. Mater. Inter.*, 2020, 12, 5775-5785.
8. K. Qi, Q. Qin, X. Duan, G. Wang, L. Wu and W. Zheng, *Chem.-Eur. J.*, 2014, 20, 9012-9017.
9. H.-S. Kil, S.-H. Hwang, J.-H. Ryu, D.-Y. Lim and S.-B. Cho, *J. Ceram. Soc. Jpn.*, 2012, 120, 52-57.
10. H. Wang, G. Li, Y. Xue and L. Li, *J. Solid State Chem.*, 2007, 180, 2790-2797.
11. J. O. Eckert, C. C. Hung-Houston, B. L. Gersten, M. M. Lencka and R. E. Riman, *J. Am. Ceram. Soc.*, 2010, 79, 2929-2939.
12. R. I. Walton, F. Millange, R. I. Smith, T. C. Hansen and D. O'Hare, *J. Am. Chem. Soc.*, 2001, 123, 12547-12555.
13. B. N. Ryzhenko, N. I. Kovalenko and N. I. Prisyagina, *Geochem. Int.*, 2006, 44, 879-895.
14. A. Testino, M. T. Buscaglia, V. Buscaglia, M. Viviani, C. Bottino and P. Nanni, *Chem. Mater.*, 2004, 16, 1536-1543.
15. Y. Liu, J. Li and I. M. Chou, *Am. Mineral.*, 2020, 105, 664-673.

16. E. J. Yeom, S. S. Shin, W. S. Yang, S. J. Lee, W. Yin, D. Kim, J. H. Noh, T. K. Ahn and S. I. Seok, *J. Mater. Chem. A*, 2017, 5, 79-86.
17. Z. Chen, G. Zhan, X. He, H. Yang and H. Wu, *Cryst. Res. Technol.*, 2011, 46, 309-314.
18. B. Li, H.-J. Sun, W. Chen, C.-Y. Zhang, Y.-B. Wang, J. Shen, J. Zhou and X.-F. Liu, *Chinese J. Inorg. Chem.*, 2009, 25, 1848-1852.
19. Y. Chen, H. Yuan, G. Tian, G. Zhang and S. Feng, *J. Solid State Chem.*, 2007, 180, 167-172.
20. X. F. Shen, Y. S. Ding, J. Liu, J. Cai, K. Laubernds, R. P. Zerger, A. Vasiliev, M. Aindow and S. L. Suib, *Adv. Mater.*, 2005, 17, 805-809.
21. M. Nyman, T. M. Alam, F. Bonhomme, M. A. Rodriguez, C. S. Frazer and M. E. Welk, *J. Clust. Sci.*, 2006, 17, 197-219.
22. Y. Hu, H. Gu, Z. Hu, W. Di, Y. Yuan, J. You, W. Cao, Y. Wang and H. L. W. Chan, *Cryst. Growth Des.*, 2008, 8, 832-837.
23. T. Sugimoto, X. Zhou and A. Muramatsu, *J. Colloid Interf. Sci.*, 2002, 252, 339-346.
24. F. Séby, M. Potin-Gautier, E. Giffaut and O. F. X. Donard, *Geochim. Cosmochim. Acta*, 2001, 65, 3041-3053.
25. J. Dean, *Lange's handbook of chemistry* /-13th ed, Science Press, Beijing, 1991.
26. S. Jiang, T. Hu, J. Gild, N. Zhou, J. Nie, M. Qin, T. Harrington, K. Vecchio and J. Luo, *Scripta Mater.*, 2018, 142, 116-120.
27. A. Sarkar, R. Djenadic, D. Wang, C. Hein, R. Kautenburger, O. Clemens and H. Hahn, *J. Eur. Ceram. Soc.*, 2018, 38, 2318-2327.
28. M. Biesuz, S. Fu, J. Dong, A. Jiang, D. Ke, Q. Xu, D. Zhu, M. Bortolotti, M. J. Reece, C. Hu and S. Grasso, *J. Asian Ceram. Soc.*, 2019, 7, 127-132.

29. J. Dabrowa, A. Olszewska, A. Falkenstein, C. Schwab, M. Szymczak, M. Zajusz, M. Mozdierz, A. Mikula, K. Zielinska, K. Berent, T. Czeppe, M. Martin and K. Swierczek, J. Mater. Chem. A, 2020, 8, 24455-24468.
30. P. A. Krawczyk, M. Jurczyszyn, J. Pawlak, W. Salamon, P. Baran, A. Kmita, L. Gondek, M. Sikora, C. Kapusta, T. Straczek, J. Wyrwa and A. Zywczyak, ACS Appl. Electron. Mater., 2020, 2, 3211-3220.
31. Y. Sharma, B. L. Musico, X. Gao, C. Hua, A. F. May, A. Herklotz, A. Rastogi, D. Mandrus, J. Yan, H. N. Lee, M. F. Chisholm, V. Keppens and T. Z. Ward, Phys. Rev. Mater., 2018, 2, 060404.
32. F. Okejiri, Z. Zhang, J. Liu, M. Liu, S. Yang and S. Dai, Chemsuschem, 2020, 13, 111-115.
